# Supplementary material
Source: MDPI journal article supplement (https://www.mdpi.com/2304-6775/12/1/6)
Supplement: s1 [file s1]

Archive with 2 entries (2 files):
- publications-2777454-SuppleMat-data-in-humanities_dataset_v1.xlsx
- table_S1.pdf
