# Supplementary material
Source: MDPI journal article supplement (https://www.mdpi.com/2304-6775/12/1/6)
Supplement: s1 [file s1 › publications-2777454-SuppleMat-data-in-humanities_dataset_v1.xlsx]

## Sheet: data
Repository	Field	Name of dataset	Dataset	Data type	Openness	License	Read-me file	Format	Findable score (7)	FAIR level	Accessible score (3)	FAIR level	Interoperable score (4)	FAIR level	Reusable score (10)	FAIR level	FAIR level overall	FAIR %
CROSSDA	philology	MegaRT: Lexical Decision Times for Croatian Words	yes	text, code, numeric, document	yes	CC BY 4.0	YES	.r, .tab, .md, .docx,.es3, .loch, .dcf	6.5	advanced	1	initial	3	moderate	2	initial	moderate	52
CROSSDA	philology	Norme slobodnih asocijacija za hrvatski jezik	yes	numeric, text	yes	CC 0	no	.tab	7	advanced	2	moderate	3	moderate	4	initial	moderate	66
Dabar	philology	Hrvatska psiholingvistička baza	yes	text	yes	CC BY NC SA	no	.json, .tsv	4	moderate	1	initial	2	moderate	1	initial	moderate	33
Dabar	philology	Metoda automatske detekcije naglašenih riječi u zvučnom zapisu : program	yes	software	yes	Copyright all rights reserved	no	.zip	5	moderate	1	initial	0	incomplete	1	initial	initial	29
Dabar	philology	Baza engleskih riječi u hrvatskome	yes	numeric, text	yes	Copyright all rights reserved	no	.xlsx	4	moderate	1	initial	0	incomplete	1	initial	initial	25
Dabar	philology	CROWD-5e: A Croatian psycholinguistic database of affective norms for five discrete emotions	yes	numeric, text	yes	Copyright all rights reserved	no	.xlsx	5	moderate	1	initial	0	incomplete	1	initial	initial	29
Dabar	philology	Baza engleskih riječi i hrvatskih istovrijednica	yes	numeric, text	yes	Copyright all rights reserved	no	.xlsx	5	moderate	1	initial	0	incomplete	1	initial	initial	29
Dabar	philology	Korpus hrvatskih novinskih portala ENGRI	yes	database	yes	Copyright all rights reserved	no	.sql	5	moderate	1	initial	0	incomplete	1	initial	initial	29
Dabar	archaeology	Ludbreg_ obrada keramike_statistika	yes	numeric	no	Copyright all rights reserved	no	.xlsx	4	moderate	1	initial	0	incomplete	1	initial	initial	25
Dabar	archaeology	Tipološko kronološka tablica rimskih keramičarskih nalaza s otoka Brača s prikazom struktura i analogija	yes	numeric, text	yes	CC BY NC SA	no	.xlsx	5	moderate	1	initial	0	incomplete	1	initial	initial	29
Dabar	archaeology	Ludbreg - tablice uz katalog	yes	numeric, text	no	Copyright all rights reserved	no	.xlsx	5	moderate	1	initial	0	incomplete	1	initial	initial	29
Dabar	archaeology	Virovitica Kiškorija jug - statistička analiza keramičkih nalaza	yes	numeric, graphic	yes	CC BY ND	no	.xlsx	4	moderate	1	initial	0	incomplete	1	initial	initial	25
Dabar	archaeology	Zastupljenost keramičkih struktura - keramika s lokaliteta Virovitica Kiškorija jug	yes	numeric	yes	CC BY ND	no	.xlsx	5	moderate	1	initial	0	incomplete	1	initial	initial	29
Dabar	art history	Dataset for the article “Constructing a Critical Situation”: A Data-Based Approach to the Study of Cultural Periodicals and Art Criticism	yes	numeric, text	yes	Copyright all rights reserved	yes	.zip	5	moderate	1	initial	0	incomplete	1	initial	initial	29
Dabar	theology	Interkulturalna kompetencija: stavovi, mišljenja i specifična ponašanja vjeroučitelja	yes	numeric, text	Limited Access	Copyright all rights reserved	yes	.xlsx, .pdf	5	moderate	1	initial	0	incomplete	1	initial	initial	29
OpenAire	interdisciplinary humanities science	PentoRef: A Corpus of Spoken References in Task-oriented Dialogues	yes	numeric	yes	GPL-3.0	yes	.zip	2.5	initial	1	initial	2	moderate	2	initial	initial	31
OpenAire	interdisciplinary humanities science	LibriVoxDeEn - A Corpus for German-to-English Speech Translation and Speech Recognition	yes	text, audio	yes	CC BY NC ND	yes	.gz, md	6.5	advanced	1	initial	4	advanced	3	initial	moderate	60
OpenAire	interdisciplinary humanities science	Keeping it simple: Implementation and performance of the proto-principle of adaptation and learning in the language sciences	yes	application	yes	CC BY 4.0	no	.rda, .gz, .mat	6	moderate	1.5	initial	3	advanced	3	initial	moderate	56
OpenAire	archaeology	Data for: ED-XRF analysis of obsidian artifacts from Yanawilka, a settlement of transplanted laborers (mitmaqkuna) and implications for Inca imperialism	yes	numeric	yes	CC BY NC 3.0	no	.docx	6	moderate	2	moderate	3	moderate	4	initial	moderate	60
OpenAire	interdisciplinary humanities science	Replication Data for: Predicting Russian aspect by frequency across genres	yes	numeric, text	yes	CC0 1.0	yes	.r, .tab	7	advanced	2	moderate	3	moderate	3	moderate	moderate	66
OpenAire	interdisciplinary humanities science	UnmixDB: A Dataset for DJ-Mix Information Retrieval	yes	audio	yes	CC BY NC ND	no	.mp3, .txt	7	advanced	3	advanced	4	advanced	6	moderate	advanced	83
OpenAire	interdisciplinary humanities science	The role of variation in phonological development: The acquisition of schwa illustrated by two Norwegian learner corpora	yes	text	yes	CC0 1.0	no	.pdf, .tab, .txt	7	advanced	2	moderate	3	moderate	4	initial	moderate	66
OpenAire	interdisciplinary humanities science	Trends in the proportion of married women of reproductive age in Spain, 1887â€“1991	yes	numeric	yes	CC BY 4.0	no	.xlsx	7	advanced	2	moderate	3	moderate	6	advanced	advanced	75
OpenAire	interdisciplinary humanities science	ParlVote: A Corpus for Sentiment Analysis of Political Debatess	yes	numeric	yes	CC BY 4.0	no	.csv	4	moderate	1	initial	2	moderate	3	initial	moderate	41
OpenAire	interdisciplinary humanities science	English WordNet Random Walk Pseudo-Corpora	yes	text	yes	CC BY 4.0	yes	.txt	5	moderate	1	initial	1	initial	2	initial	initial	37
OpenAire	interdisciplinary humanities science	A Process-oriented Dataset of Revisions during Writing	yes	numeric	yes	CC BY-NC 4.0	no	.pdf, .csv	6.5	advanced	1	initial	3	moderate	4	initial	moderate	60
OpenAire		Communication and community. An ELF perspective on critical contexts	no
OpenAire		Announcing the 2017 â€Dance Your Ph.D.' contest!	no
OpenAire		Nighttime light pollution covers nearly 80% of the globe	no
OpenAire		Recontextualización sociolingüística y superdiversidad. El árabe en el paisaje lingüístico del barrio de Lavapiés en Madrid	no
OpenAire		Facing #emergencies. The linguistic role of keywords, hashtags and retweets in communicating critical events	no
OpenAire		Vitantonio Gioia, Sergio Noto, Alfonso SĂˇnchez Hormigo (eds), Pensiero critico ed economia politica nel XIX secolo: da Saint-Simon a Proudhon, (Critical Thinking and Political Economy in the 19th century: From Saint-Simon to Proudhon) Bologna, il Mulino, 2015.	no
OpenAire		Should Sleeping Dogs Be Woken? Conflict, Participation and Deliberative Arenas	no
OpenAire		Plurilingual communication in elf talk. From exploration to Application of elf-oriented perspectives	no
OpenAire		I'm Duncan Pritchard, philosopher working on knowledge, scepticism, applied epistemology and author of 'Epistemic Angst: Radical Skepticism and the Groundlessness of Our Believing'. AMA!	no
OpenAire		The sexual misconduct case that has rocked anthropology	no
OpenAire		Tweeting engagement'. Strategies of identity construction and 'alignment-disalignment' in Donald Trump's use of social media	no
OpenAire		The discursive topicalisation of trust, ethics and ideology in European security issues	no
OpenAire		New gene drive technology could wipe out malaria, but is it safe?	no
OpenAire		Leading Salk scientist resigns after allegations of harassment	no
OpenAire		CREATIVITY AND READABILITY IN GAME LOCALISATION A Case Study on Ni No Kuni	no
OpenAire		The De-Politicization of Social Policy at the Time of Social Investment. Mechanisms and Distinctive Features	no
OpenAire		El estudio del paisaje lingĂĽĂ­stico de la migraciĂłn en MilĂˇn. Perspectiva etnogrĂˇfica y localizaciĂłn espacial	no
OpenAire		From self-talk to grammar. The emergence of multiple paradigms from self-quoted questions in Korean	no
OpenAire		Observation of gravitational waves	no
OpenAire		Paisaje lingĂĽĂ­stico. Un recurso TIC-TAC-TEP para el aula	no
OpenAire		Berber Languages and Linguistics	no
OpenAire		Responding to gratitude in elicited oral interaction. A taxonomy of communicative options	no
OpenAire		Voicing beliefs and dilemmas from WE- and ELF-aware reflective teacher education contexts	no
OpenAire		INVESTIGATING STUDENT CHOICES IN PERFORMING HIGHER-ORDER COMPREHENSION TASKS USING TED TALKS IN LEARNWEB	no
OpenAire		Prosody in tourist oral communication. Pausing in city audio guides	no
OpenAire		Reproducibility: does it really matter?	no
OpenAire		TINTIN: a Tool for INcremental INTegrity checking of Assertions in SQL Server	no
OpenAire		Epistemic modality in the visual 'art of dissent': the expression of 'realism' in ideological and political Sardinian murales	no
OpenAire		Talking about lament in Ancient Greek drama. Historical metapragmatics and language ideology in Sophocles' Ajax	no
OpenAire		Representing culture in Opencourseware lectures. A corpus-based semantic analysis	no
OpenAire		There's no such thing as a 'pure' Europeanâ€”or anyone else	no
OpenAire		(Trans)Gender in the News: Specialized language in the UK press. A corpus-based discourse analysis	no
OpenAire		Knowledge dissemination and evidentiality in the genre of posters. Anatomy of a condensed medical discourse	no
OpenAire		A study of cognitive-experiential practices for promoting ELF communicative competence in Italian ELT classrooms	no
OpenAire		From the VVINGPP construction to the VVING pattern. A descriptive account	no
OpenAire		Just a few lines to let you know'. Formulaic language and personalization strategies in Great War trench letters written by semi-literate Scottish soldiers	no
OpenAire		Learners' awareness and attitude towards ELF. A pilot study in an Italian University context	no
OpenAire		Pares lĂ©xicos en el lĂ©xico disponible de estudiantes italianos	no
OpenAire		Irony as a complex attitude	no
OpenAire		Towards sequenced semantics for evolving graphs	no
OpenAire		Investigating the language of red wine tasting notes across the US, the Australian and the Italian cultures	no
OpenAire		Mouse egg cells made entirely in the lab give rise to healthy offspring	no
OpenAire		Language Landscape. An innovative tool for documenting and analysing linguistic landscapes	no
OpenAire		Progressive and regressive transfer in third language acquisition and development: An up-to-date review	no
OpenAire		Haudricourt, AndrĂ©-Georges (1911-1996)	no
OpenAire		China to create its own DARPA	no
OpenAire		Gerald Manley Hopkins's Ecosophical Lament	no
OpenAire		How to do things with modes. Transmodality in slides	no
OpenAire		Performing Griko beyond 'death'	no
OpenAire		Communicative 'success', creativity and the need for de-mystifying L1 use: Some thoughts on ELF and ELT	no
OpenAire		The 'power of incantation': A linguistic analysis of European theme parks' websites	no
OpenAire		NEOLIBERALISM AS THE â€śCONNECTIVE TISSUEâ€ť OF CONTEMPORARY CAPITALISM	no
OpenAire		ENGLISH FOR TOURISM Using translated texts in the classroom to improve writing skills	no
OpenAire		Debate as a Teaching Strategy for Language Learning	no
OpenAire		English as a Lingua Franca in the academic world: Trends and dilemmas	no
OpenAire		What a massive database of retracted papers reveals about science publishing's â€death penalty'	no
OpenAire		ELF awareness in ELT: Emerging challenges and new paradigms in teacher education	no
OpenAire		(Co)constructing use, belonging and legitimacy. A study of English language ownership in Italy	no
OpenAire		Aberdeen Burgh Records Database	no
OpenAire		Ms Marvel: Metamorphosis and Transfiguration of the 'Minority' Superhero	no
OpenAire		The little O'. Signifying Nothing in Shakespeare	no
OpenAire		Linguistic landscape e contesti educativi. Uno studio all'interno di alcune scuole italiane	no
OpenAire		Promoting cross-linguistic awareness. English motion events in a multilingual teaching model	no
OpenAire		Immunologically speaking: Oral examinations, ELF and EMI	no
OpenAire		IDEOLOGICAL AND LANGUAGE POLARIZATION IN ONLINE POLITICAL DISCOURSE The White House Facebook page	no
OpenAire		Exploring Social and Solidarity Economy (SSE) during the Greek Economic Crisis	no
OpenAire		Fast Subsequence Search on Time Series Data	no
OpenAire		How specialized (or popularized)? Terminological density as a clue to text specialization in the domain of food safety	no
OpenAire		TRANSLANGUAGING WITHIN ENGLISH AS A (MULTI) LINGUA FRANCA Implications for business enterprises in a globalised economy	no
OpenAire		When a relationship ends 'there can be no turning back'. The divorce metaphor in the Brexit discourse	no
OpenAire		Developing awareness of interference errors in translation. An English-Spanish pilot study in popular science and audiovisual transcripts	no
OpenAire		How am I to answer this in English?'. Pragmatic fluency in a nineteenth-century English-language teaching text	no
OpenAire		El paisaje lingĂĽĂ­stico desde la lingĂĽĂ­stica perceptiva	no
OpenAire		Waiting for your info'. An explanatory look at the communicative strategies deployed to mitigate potentially face-threatening acts in emails	no
OpenAire		Competence, capability and virtual language	no
OpenAire		Exploring ELT practices, teachers' professional profile and beliefs: Analysing data from the PRIN survey and envisaging pedagogical projections	no
OpenAire		EspaĂ±ol e italiano en el paisaje lingĂĽĂ­stico de MilĂˇn. ÂżTraducciĂłn, mediaciĂłn o translanguaging?	no
OpenAire		Direct hate speech vs. indirect fear speech. A multimodal critical discourse analysis of the Sun's editorial '1 in 5 Brit Muslims' sympathy for jihadis'	no
OpenAire		Audiodescripciones alternativas de sexo. Los usuarios opinan	no
OpenAire		Migration â€“ What is in a word	no
OpenAire		Towards a corpus pragmatics of ELF through semi-automated annotation systems	no
OpenAire		AN EMPIRICAL TAKE ON THE DUBBING VS. SUBTITLING DEBATE An Eye Movement Study	no
OpenAire		Communication strategies in BELF e-mailing: 'Only' a matter of shared understanding?	no
OpenAire		The MWSWeb Project: Accessing medical discourse in video hosting websites	no
OpenAire		The construction of textual cohesion in Spanish and Italian, as mother tongues and as second languages	no
OpenAire		The Concept of De-Politicization and Its Consequences	no
OpenAire		Scalable and Dynamic Regeneration of Big Data Volumes	no
OpenAire		Software Power as Soft Power. A Literature Review on Computational Propaganda Effects in Public Opinion and Political Process	no
OpenAire		WHAT IS THE USE OF NEOLIBERALISM AND NEOLIBERALISATION? Contentious concepts between description and explanation?	no
OpenAire		Is health care ready for routine DNA screening? A massive new trial will find out	no
OpenAire		Bringing image manipulation to light	no
OpenAire		Liquid biopsy' promises early detection for cancer	no
OpenAire		Linguistic demands and language assistance in EMI courses. What is the stance of Italian and Spanish undergraduates?	no
OpenAire		The cultural and creative use of English as a Lingua Franca	no
OpenAire		Patterns of metaphysical discourse in West-African migrants' ELF-mediated trauma narratives	no
OpenAire		Medieval Settlement Research Group Publications	no
OpenAire		World trade, 1800-1938 : a new data-set	no
